# Supplementary material
Source: ML conference proceedings conference paper supplement (https://proceedings.neurips.cc/paper_files/paper/2007/hash/a8e864d04c95572d1aece099af852d0a-Abstract.html)
Supplement: Supplementary file [file a8e864d04c95572d1aece099af852d0a-Supplemental.zip]

# W17: AN ANALYSIS OF INFERENCE WITH THE UNIVERSUM

FABIAN SINZ, OLIVIER CHAPELLE, ALEKH AGARWAL & BERNHARD SCHÖLKOPF

Data-dependent regularization with the Universum  $\mathcal{U} = \{\mathbf{z}_1, \dots, \mathbf{z}_q\}$  :

$$\min_{\mathbf{w}, b} \frac{1}{2} \|\mathbf{w}\|^2 + C_{\mathcal{U}} \sum_{i=1}^m H_{+1, -1}[\langle \mathbf{w}, \mathbf{x}_i \rangle + b] + C_{\mathcal{U}} \sum_{j=1}^q I[\langle \mathbf{w}, \mathbf{z}_j \rangle + b]$$

with  $H =$   and  $I =$   ( $\mathcal{U}$ -SVM) or  $H =$   and  $I =$   ( $\mathcal{U}_{\text{fs}}$ -SVM)

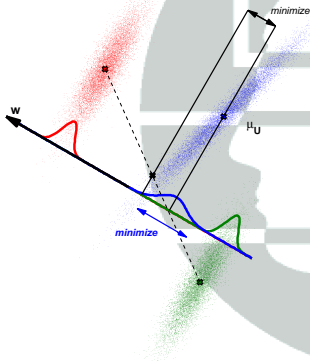

## Results for $\mathcal{U}$ -SVM

- For  $C_{\mathcal{U}} = \infty$  the solution  $\mathbf{w}^*$  lives on the **orthogonal complement** of the affine subspace spanned by  $\mathcal{U}$
- For  $C_{\mathcal{U}} < \infty$  the  $\mathcal{U}$ -SVM **minimizes an upper bound** on the " **$L_1$ -variance**"  
$$C_{\mathcal{U}} \sum_{j=1}^q |\langle \mathbf{w}^*, \mathbf{z}_j \rangle + b^*| \geq C_{\mathcal{U}} \min_b \sum_{j=1}^q |\langle \mathbf{w}^*, \mathbf{z}_j \rangle + b|$$

## Results for $\mathcal{U}_{\text{fs}}$ -SVM

- The  $\mathcal{U}_{\text{fs}}$ -SVM is equivalent (up to a linear constraint) to a **hybrid** of **oriented PCA** and **Fisher Discriminant Analysis** where  $\mathcal{U}$  specifies the "noise directions" in oriented PCA

## Results

- Both, the **absolute position** as well as the **main principal axes** influence the solution  $\mathbf{w}^*$

The Universum set  $\mathcal{U}$  allows to **specify implicit invariance directions** but must be **carefully chosen**
